# Supplementary material
Source: publisher figshare collection journal article supplement (https://acs.figshare.com/ndownloader/files/3803050)
Supplement: Supplementary file 1 [file 3803050]

 
data_psr117m 
 
_audit_creation_method            SHELXL-97 
_chemical_name_systematic 
; 
 ? 
; 
_chemical_name_common             ? 
_chemical_melting_point           ? 
_chemical_formula_moiety          'C10 H8 N4, 2(C7 H4 N2 O6)' 
_chemical_formula_sum 
 'C24 H16 N8 O12' 
_chemical_formula_weight          608.45 
 
loop_ 
 _atom_type_symbol 
 _atom_type_description 
 _atom_type_scat_dispersion_real 
 _atom_type_scat_dispersion_imag 
 _atom_type_scat_source 
 'C'  'C'   0.0033   0.0016 
 'International Tables Vol C Tables 4.2.6.8 and 6.1.1.4' 
 'H'  'H'   0.0000   0.0000 
 'International Tables Vol C Tables 4.2.6.8 and 6.1.1.4' 
 'N'  'N'   0.0061   0.0033 
 'International Tables Vol C Tables 4.2.6.8 and 6.1.1.4' 
 'O'  'O'   0.0106   0.0060 
 'International Tables Vol C Tables 4.2.6.8 and 6.1.1.4' 
 
_symmetry_cell_setting            Triclinic  
_symmetry_space_group_name_H-M    P-1 
 
loop_ 
 _symmetry_equiv_pos_as_xyz 
 'x, y, z' 
 '-x, -y, -z' 
 
_cell_length_a                    4.6421(12) 
_cell_length_b                    9.923(3) 
_cell_length_c                    14.773(4) 
_cell_angle_alpha                 106.135(4) 
_cell_angle_beta                  93.894(4) 
_cell_angle_gamma                 91.467(4) 
_cell_volume                      651.5(3) 
_cell_formula_units_Z             1 
_cell_measurement_temperature     273(2) 
_cell_measurement_reflns_used     1474 
_cell_measurement_theta_min       ? 
_cell_measurement_theta_max       25.000
 
_exptl_crystal_description        'Rectangular block'  
_exptl_crystal_colour             'Orange' 
_exptl_crystal_size_max           0.30 
_exptl_crystal_size_mid           0.24 
_exptl_crystal_size_min           0.18 
_exptl_crystal_density_meas       ? 
_exptl_crystal_density_diffrn     1.551 
_exptl_crystal_density_method     'not measured' 
_exptl_crystal_F_000              312 
_exptl_absorpt_coefficient_mu     0.128 
_exptl_absorpt_correction_type    'empirical'  
_exptl_absorpt_correction_T_min   0.962
_exptl_absorpt_correction_T_max   0.977
_exptl_absorpt_process_details    'sadabs;sheldrick,1996' 
 
_exptl_special_details 
; 
 ? 
; 
 
_diffrn_ambient_temperature       273(2) 
_diffrn_radiation_wavelength      0.71073 
_diffrn_radiation_type            MoK\a 
_diffrn_radiation_source          'fine-focus sealed tube' 
_diffrn_radiation_monochromator   graphite 
_diffrn_measurement_device_type   ? 
_diffrn_measurement_method        ? 
_diffrn_detector_area_resol_mean  ? 
_diffrn_standards_number          ? 
_diffrn_standards_interval_count  ? 
_diffrn_standards_interval_time   ? 
_diffrn_standards_decay_%         ? 
_diffrn_reflns_number             6181 
_diffrn_reflns_av_R_equivalents   0.0243 
_diffrn_reflns_av_sigmaI/netI     0.0370 
_diffrn_reflns_limit_h_min        -5 
_diffrn_reflns_limit_h_max        5 
_diffrn_reflns_limit_k_min        -11 
_diffrn_reflns_limit_k_max        11 
_diffrn_reflns_limit_l_min        -17 
_diffrn_reflns_limit_l_max        17 
_diffrn_reflns_theta_min          1.44 
_diffrn_reflns_theta_max          25.00 
_reflns_number_total              2294 
_reflns_number_gt                 1474 
_reflns_threshold_expression      >2sigma(I) 
 
_computing_data_collection        ? 
_computing_cell_refinement        ? 
_computing_data_reduction         ? 
_computing_structure_solution     'SHELXS-97 (Sheldrick, 1990)' 
_computing_structure_refinement   'SHELXL-97 (Sheldrick, 1997)' 
_computing_molecular_graphics     ? 
_computing_publication_material   ? 
 
_refine_special_details 
; 
 Refinement of F^2^ against ALL reflections.  The weighted R-factor wR and 
 goodness of fit S are based on F^2^, conventional R-factors R are based 
 on F, with F set to zero for negative F^2^. The threshold expression of 
 F^2^ > 2sigma(F^2^) is used only for calculating R-factors(gt) etc. and is 
 not relevant to the choice of reflections for refinement.  R-factors based 
 on F^2^ are statistically about twice as large as those based on F, and R- 
 factors based on ALL data will be even larger. 
; 
 
_refine_ls_structure_factor_coef  Fsqd  
_refine_ls_matrix_type            full 
_refine_ls_weighting_scheme       calc  
_refine_ls_weighting_details 
 'calc w=1/[\s^2^(Fo^2^)+(0.0824P)^2^+0.0000P] where P=(Fo^2^+2Fc^2^)/3' 
_atom_sites_solution_primary      direct 
_atom_sites_solution_secondary    difmap 
_atom_sites_solution_hydrogens    geom 
_refine_ls_hydrogen_treatment     mixed 
_refine_ls_extinction_method      none 
_refine_ls_extinction_coef        ? 
_refine_ls_number_reflns          2294 
_refine_ls_number_parameters      203 
_refine_ls_number_restraints      1 
_refine_ls_R_factor_all           0.0764 
_refine_ls_R_factor_gt            0.0460 
_refine_ls_wR_factor_ref          0.1264 
_refine_ls_wR_factor_gt           0.1150 
_refine_ls_goodness_of_fit_ref    0.936 
_refine_ls_restrained_S_all       0.936 
_refine_ls_shift/su_max           0.000 
_refine_ls_shift/su_mean          0.000 
 
loop_ 
 _atom_site_label 
 _atom_site_type_symbol 
 _atom_site_fract_x 
 _atom_site_fract_y 
 _atom_site_fract_z 
 _atom_site_U_iso_or_equiv 
 _atom_site_adp_type 
 _atom_site_occupancy 
 _atom_site_symmetry_multiplicity 
 _atom_site_calc_flag 
 _atom_site_refinement_flags 
 _atom_site_disorder_assembly 
 _atom_site_disorder_group 
C1 C -0.0720(4) 0.0840(2) 0.71804(16) 0.0498(5) Uani 1 1 d . . . 
C2 C -0.2550(4) 0.1648(2) 0.79372(14) 0.0439(5) Uani 1 1 d . . . 
C3 C -0.2591(4) 0.1349(2) 0.87978(14) 0.0462(5) Uani 1 1 d . . . 
H3 H -0.1515 0.0631 0.8918 0.055 Uiso 1 1 calc R . . 
C4 C -0.4265(4) 0.2138(2) 0.94775(14) 0.0471(5) Uani 1 1 d . . . 
C5 C -0.5942(4) 0.3184(2) 0.93132(14) 0.0480(5) Uani 1 1 d . . . 
H5 H -0.7085 0.3693 0.9770 0.058 Uiso 1 1 calc R . . 
C6 C -0.5868(4) 0.3447(2) 0.84554(14) 0.0457(5) Uani 1 1 d . . . 
C7 C -0.4186(4) 0.27113(19) 0.77616(14) 0.0466(5) Uani 1 1 d . . . 
H7 H -0.4153 0.2926 0.7188 0.056 Uiso 1 1 calc R . . 
C8 C 0.4598(4) -0.1707(2) 0.54627(15) 0.0559(6) Uani 1 1 d . . . 
H8 H 0.3744 -0.1076 0.5177 0.067 Uiso 1 1 calc R . . 
C9 C 0.6542(5) -0.2619(2) 0.49824(15) 0.0563(6) Uani 1 1 d . . . 
H9 H 0.7047 -0.2582 0.4391 0.068 Uiso 1 1 calc R . . 
C10 C 0.7709(4) -0.3578(2) 0.53932(14) 0.0472(5) Uani 1 1 d . . . 
C11 C 0.7007(5) -0.3589(2) 0.62810(15) 0.0547(6) Uani 1 1 d . . . 
H11 H 0.7791 -0.4229 0.6573 0.066 Uiso 1 1 calc R . . 
C12 C 0.5108(5) -0.2625(2) 0.67229(15) 0.0576(6) Uani 1 1 d . . . 
H12 H 0.4638 -0.2612 0.7327 0.069 Uiso 1 1 calc R . . 
N1 N 0.3916(3) -0.17068(17) 0.63165(12) 0.0521(5) Uani 1 1 d . . . 
N2 N 0.9712(4) -0.45065(18) 0.48426(12) 0.0583(5) Uani 1 1 d . . . 
N3 N -0.4272(4) 0.1849(2) 1.03981(13) 0.0626(5) Uani 1 1 d . . . 
N4 N -0.7666(4) 0.45525(18) 0.82614(15) 0.0606(5) Uani 1 1 d . . . 
O1 O 0.0607(3) -0.01455(17) 0.74243(11) 0.0681(5) Uani 1 1 d D . . 
O2 O -0.0562(4) 0.11385(18) 0.64498(11) 0.0770(5) Uani 1 1 d . . . 
O3 O -0.2616(4) 0.1015(2) 1.05758(12) 0.0882(6) Uani 1 1 d . . . 
O4 O -0.5945(5) 0.2473(2) 1.09488(13) 0.0984(7) Uani 1 1 d . . . 
O5 O -0.9140(4) 0.51876(17) 0.88854(13) 0.0825(6) Uani 1 1 d . . . 
O6 O -0.7639(4) 0.47556(19) 0.74883(14) 0.0915(6) Uani 1 1 d . . . 
H1O H 0.162(6) -0.062(3) 0.6980(16) 0.124(12) Uiso 1 1 d D . . 
 
loop_ 
 _atom_site_aniso_label 
 _atom_site_aniso_U_11 
 _atom_site_aniso_U_22 
 _atom_site_aniso_U_33 
 _atom_site_aniso_U_23 
 _atom_site_aniso_U_13 
 _atom_site_aniso_U_12 
C1 0.0513(12) 0.0449(12) 0.0509(13) 0.0076(10) 0.0096(10) 0.0114(10) 
C2 0.0405(11) 0.0402(11) 0.0482(12) 0.0070(9) 0.0048(9) 0.0094(9) 
C3 0.0452(11) 0.0400(11) 0.0534(13) 0.0112(9) 0.0065(9) 0.0133(9) 
C4 0.0468(11) 0.0463(12) 0.0468(12) 0.0100(9) 0.0049(9) 0.0076(10) 
C5 0.0440(11) 0.0410(11) 0.0539(13) 0.0030(10) 0.0094(9) 0.0086(9) 
C6 0.0435(11) 0.0369(11) 0.0538(13) 0.0073(9) 0.0029(9) 0.0122(9) 
C7 0.0491(12) 0.0430(11) 0.0457(12) 0.0095(9) 0.0020(9) 0.0072(10) 
C8 0.0602(14) 0.0522(13) 0.0578(14) 0.0167(11) 0.0096(11) 0.0205(11) 
C9 0.0595(13) 0.0601(14) 0.0506(13) 0.0138(11) 0.0141(10) 0.0180(11) 
C10 0.0415(11) 0.0457(12) 0.0504(12) 0.0038(9) 0.0124(9) 0.0140(9) 
C11 0.0580(13) 0.0518(13) 0.0571(14) 0.0166(10) 0.0106(11) 0.0218(11) 
C12 0.0666(14) 0.0586(13) 0.0495(12) 0.0134(11) 0.0197(11) 0.0196(12) 
N1 0.0512(10) 0.0479(10) 0.0552(11) 0.0078(8) 0.0127(8) 0.0170(9) 
N2 0.0584(11) 0.0576(12) 0.0608(12) 0.0156(9) 0.0154(9) 0.0203(9) 
N3 0.0699(13) 0.0663(13) 0.0535(12) 0.0174(10) 0.0109(10) 0.0158(11) 
N4 0.0634(12) 0.0458(11) 0.0709(13) 0.0125(10) 0.0028(10) 0.0189(9) 
O1 0.0747(11) 0.0634(10) 0.0698(11) 0.0162(9) 0.0278(9) 0.0397(9) 
O2 0.1002(13) 0.0789(11) 0.0587(10) 0.0220(9) 0.0307(9) 0.0358(10) 
O3 0.1058(14) 0.0960(13) 0.0735(12) 0.0383(11) 0.0081(10) 0.0386(11) 
O4 0.1182(15) 0.1212(16) 0.0687(12) 0.0349(11) 0.0459(11) 0.0515(13) 
O5 0.0815(12) 0.0653(11) 0.0987(13) 0.0123(10) 0.0231(10) 0.0433(10) 
O6 0.1229(16) 0.0791(12) 0.0813(13) 0.0328(10) 0.0084(11) 0.0509(11) 
 
_geom_special_details 
; 
 All esds (except the esd in the dihedral angle between two l.s. planes) 
 are estimated using the full covariance matrix.  The cell esds are taken 
 into account individually in the estimation of esds in distances, angles 
 and torsion angles; correlations between esds in cell parameters are only 
 used when they are defined by crystal symmetry.  An approximate (isotropic) 
 treatment of cell esds is used for estimating esds involving l.s. planes. 
; 
 
loop_ 
 _geom_bond_atom_site_label_1 
 _geom_bond_atom_site_label_2 
 _geom_bond_distance 
 _geom_bond_site_symmetry_2 
 _geom_bond_publ_flag 
C1 O2 1.202(2) . ? 
C1 O1 1.289(3) . ? 
C1 C2 1.510(3) . ? 
C2 C3 1.385(3) . ? 
C2 C7 1.387(3) . ? 
C3 C4 1.388(3) . ? 
C4 C5 1.378(3) . ? 
C4 N3 1.466(3) . ? 
C5 C6 1.365(3) . ? 
C6 C7 1.384(3) . ? 
C6 N4 1.474(3) . ? 
C8 N1 1.321(3) . ? 
C8 C9 1.382(3) . ? 
C9 C10 1.367(3) . ? 
C10 C11 1.376(3) . ? 
C10 N2 1.451(3) . ? 
C11 C12 1.376(3) . ? 
C12 N1 1.334(3) . ? 
N2 N2 1.223(3) 2_746 ? 
N3 O3 1.213(2) . ? 
N3 O4 1.216(2) . ? 
N4 O6 1.215(2) . ? 
N4 O5 1.225(2) . ? 
 
loop_ 
 _geom_angle_atom_site_label_1 
 _geom_angle_atom_site_label_2 
 _geom_angle_atom_site_label_3 
 _geom_angle 
 _geom_angle_site_symmetry_1 
 _geom_angle_site_symmetry_3 
 _geom_angle_publ_flag 
O2 C1 O1 126.2(2) . . ? 
O2 C1 C2 121.40(18) . . ? 
O1 C1 C2 112.37(19) . . ? 
C3 C2 C7 120.09(18) . . ? 
C3 C2 C1 121.00(17) . . ? 
C7 C2 C1 118.91(18) . . ? 
C2 C3 C4 118.89(17) . . ? 
C5 C4 C3 122.02(19) . . ? 
C5 C4 N3 118.72(18) . . ? 
C3 C4 N3 119.27(18) . . ? 
C6 C5 C4 117.63(19) . . ? 
C5 C6 C7 122.60(18) . . ? 
C5 C6 N4 118.53(18) . . ? 
C7 C6 N4 118.87(19) . . ? 
C6 C7 C2 118.76(19) . . ? 
N1 C8 C9 121.9(2) . . ? 
C10 C9 C8 118.7(2) . . ? 
C9 C10 C11 119.85(18) . . ? 
C9 C10 N2 115.50(18) . . ? 
C11 C10 N2 124.63(18) . . ? 
C10 C11 C12 117.92(19) . . ? 
N1 C12 C11 122.4(2) . . ? 
C8 N1 C12 119.17(17) . . ? 
N2 N2 C10 112.7(2) 2_746 . ? 
O3 N3 O4 123.4(2) . . ? 
O3 N3 C4 118.93(19) . . ? 
O4 N3 C4 117.71(19) . . ? 
O6 N4 O5 124.22(18) . . ? 
O6 N4 C6 118.06(19) . . ? 
O5 N4 C6 117.7(2) . . ? 
 
_diffrn_measured_fraction_theta_max    0.996 
_diffrn_reflns_theta_full              25.00 
_diffrn_measured_fraction_theta_full   0.996 
_refine_diff_density_max    0.356 
_refine_diff_density_min   -0.166 
_refine_diff_density_rms    0.048 
